# Supplementary material for: Specific Changes in the Mammalian Gut Microbiome as a Biomarker for Oxytocin-Induced Behavioral Changes
Source: MDPI journal article supplement (doi:10.3390/microorganisms9091938), 2021-09-12
Supplement: s1 [file s1]

Supplementary Figure S1.

**Effects of different treatments on the rat fecal microbiota.** n; each point represents the microbiota composition of a single cage. **A:** Samples from the corticosterone treated-group only; pre-treatment (green) vs post-treatment (red) ANOSIM, **P=0.003, R=0.23**. **B:** Samples from the oxytocin treated-group only; pre-treatment (green) vs post-treatment (red) ANOSIM, **P=0.001, R=0.54**. **C:** Samples from the citalopram treated-group only; pre-treatment (green) vs post-treatment (red) ANOSIM, P=0.1, R=0.07.

Supplementary Figure S2.

**Microbiota composition shift following various treatments.** **A.** The Microbiota composition shift (weighted UniFrac distances between phase I (pre-treatment) and phase II (post-treatment) microbiota samples) n; each point represents a single cage.

Supplementary Figure S3.

**Effects of corticosterone and citalopram on the rat fecal microbiota .** PCoA of the unweighted UniFrac matrix of all – post-treatment samples. **A.** Corticosterone, ANOSIM, **P=0.001, R=0.43**. **B.** Citalopram had no statistically significant effect.

Supplementary Figure S4.

**Bacterial genera significantly differentiating oxytocin-treated and non-treated groups.** First experiment: each circle represents a single cage pool. Second experiment: each circle represents a single animal. phase-I: pre-treatment, phase-II: post-treatment.

**A.** *Eubacterium*; **B.** *Collinsella*.
