# Supplementary material for: Specific Changes in the Mammalian Gut Microbiome as a Biomarker for Oxytocin-Induced Behavioral Changes
Source: MDPI journal article supplement (doi:10.3390/microorganisms9091938), 2021-09-12
Supplement: s1 [file s1]

Supplementary Figure S3.

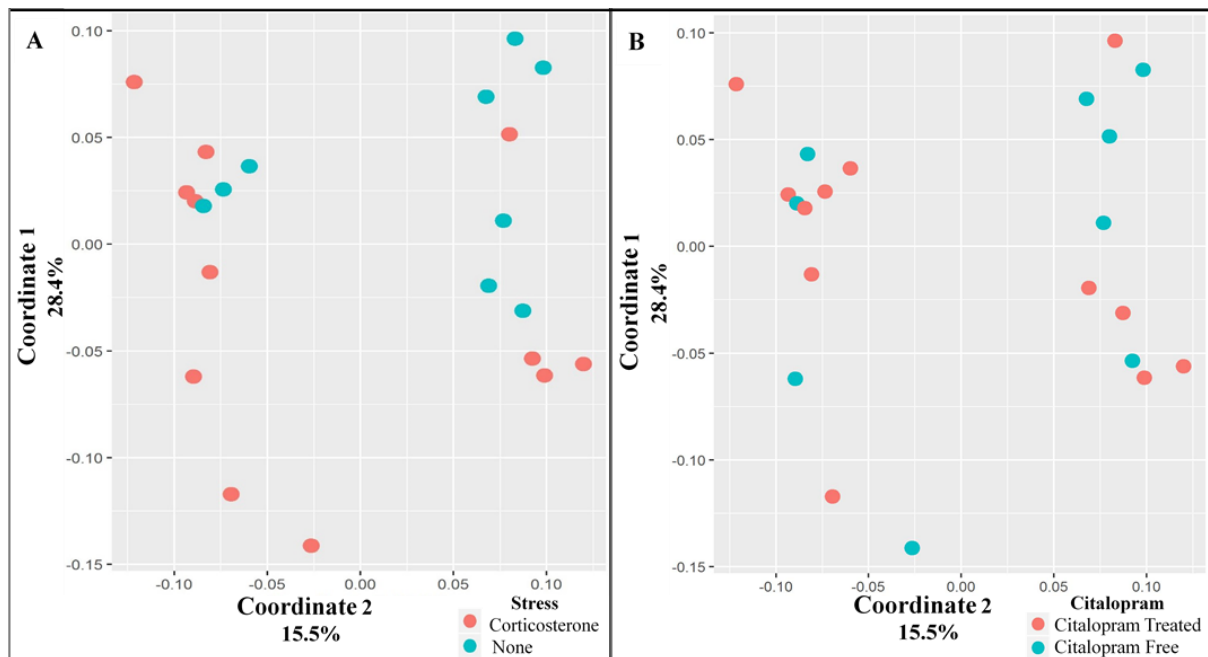

Supplementary Figure S3. **Treatment effect on microbiota.** PCoA of the unweighted UniFrac matrix of all – post-treatment samples. **A.** Corticosterone, ANOSIM,  $P=0.001$ ,  $R=0.43$ . **B.** Citalopram had no statistically significant effect.
