# Supplementary material for: Specific Changes in the Mammalian Gut Microbiome as a Biomarker for Oxytocin-Induced Behavioral Changes
Source: MDPI journal article supplement (doi:10.3390/microorganisms9091938), 2021-09-12
Supplement: s1 [file s1]

Supplementary Figure S4.

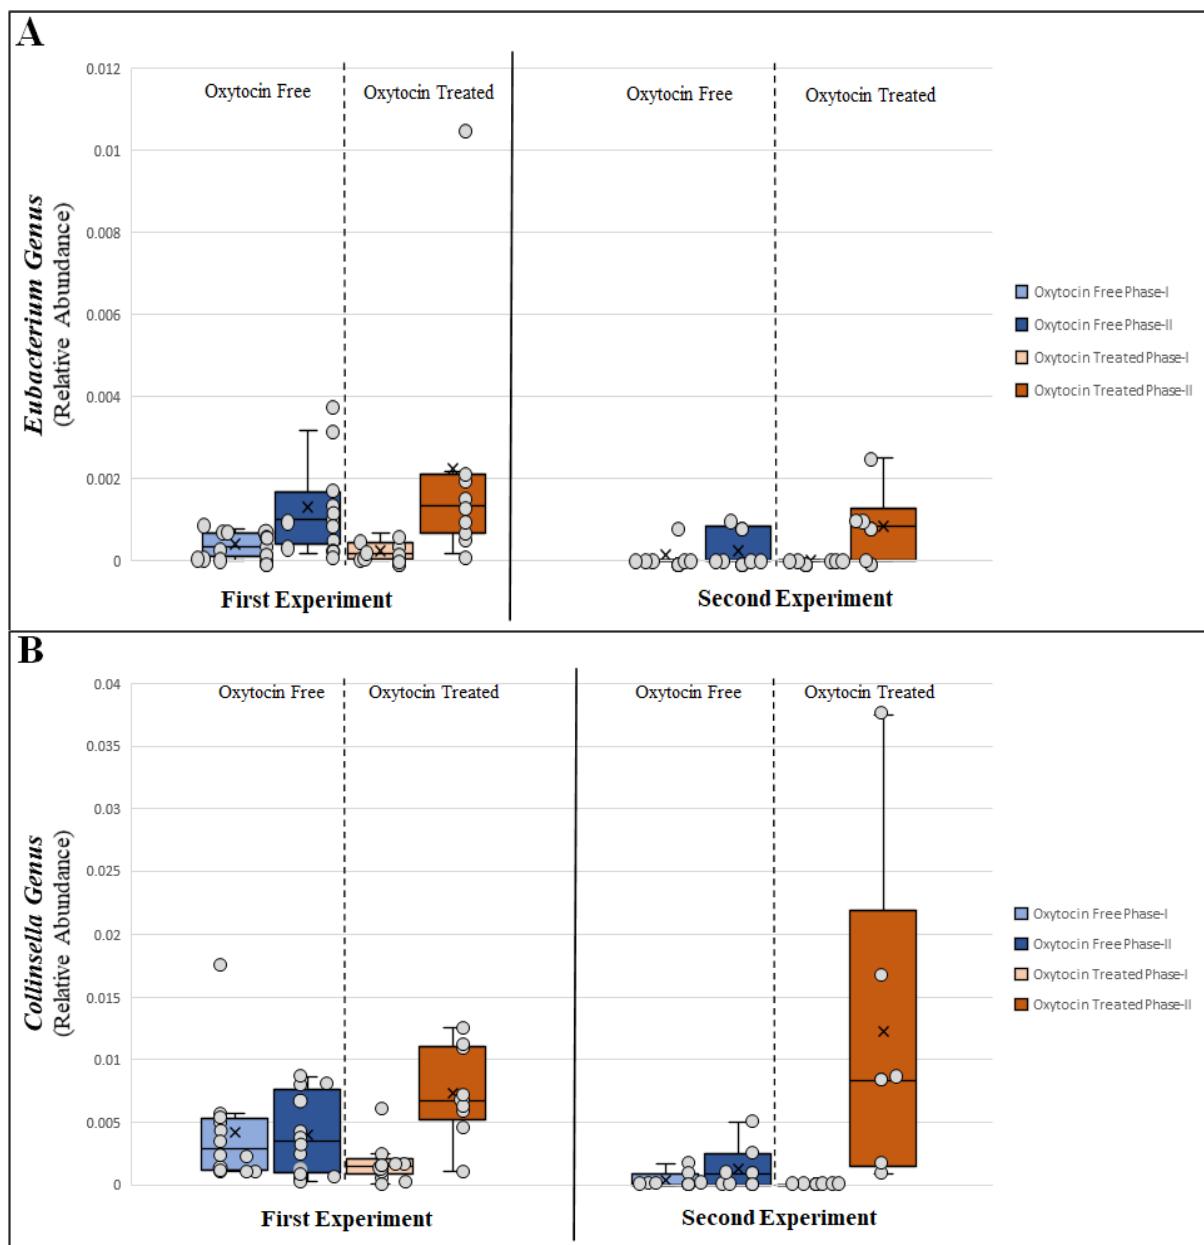

Supplementary Figure S4. **Bacterial genera significantly differentiating oxytocin-treated and non-treated groups.** First experiment: each circle represents a single cage pool. Second experiment: each circle represents a single animal. Phase-I: pre-treatment, phase-II: post-treatment. **A.** *Eubacterium*; **B.** *Collinsella*.
