# Supplementary material for: Specific Changes in the Mammalian Gut Microbiome as a Biomarker for Oxytocin-Induced Behavioral Changes
Source: MDPI journal article supplement (doi:10.3390/microorganisms9091938), 2021-09-12
Supplement: s1 [file s1]

Supplementary Figure S2.

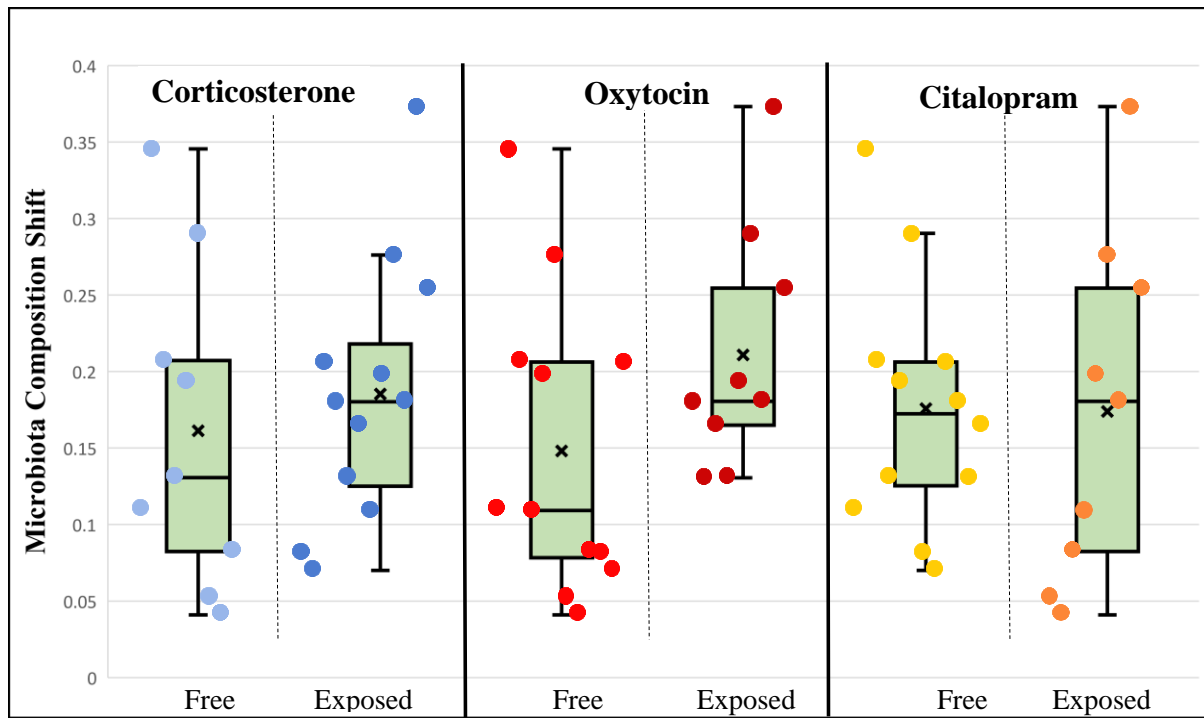

Supplementary Figure S2. **Treatment effect on microbiota.** The Microbiota Composition Shift (weighted UniFrac distances between phase I (pre-treatment) and phase II (post-treatment) microbiota samples) n; each point represents a single cage.
