# Supplementary material for: Specific Changes in the Mammalian Gut Microbiome as a Biomarker for Oxytocin-Induced Behavioral Changes
Source: MDPI journal article supplement (doi:10.3390/microorganisms9091938), 2021-09-12
Supplement: s1 [file s1]

Supplementary Figure S1.

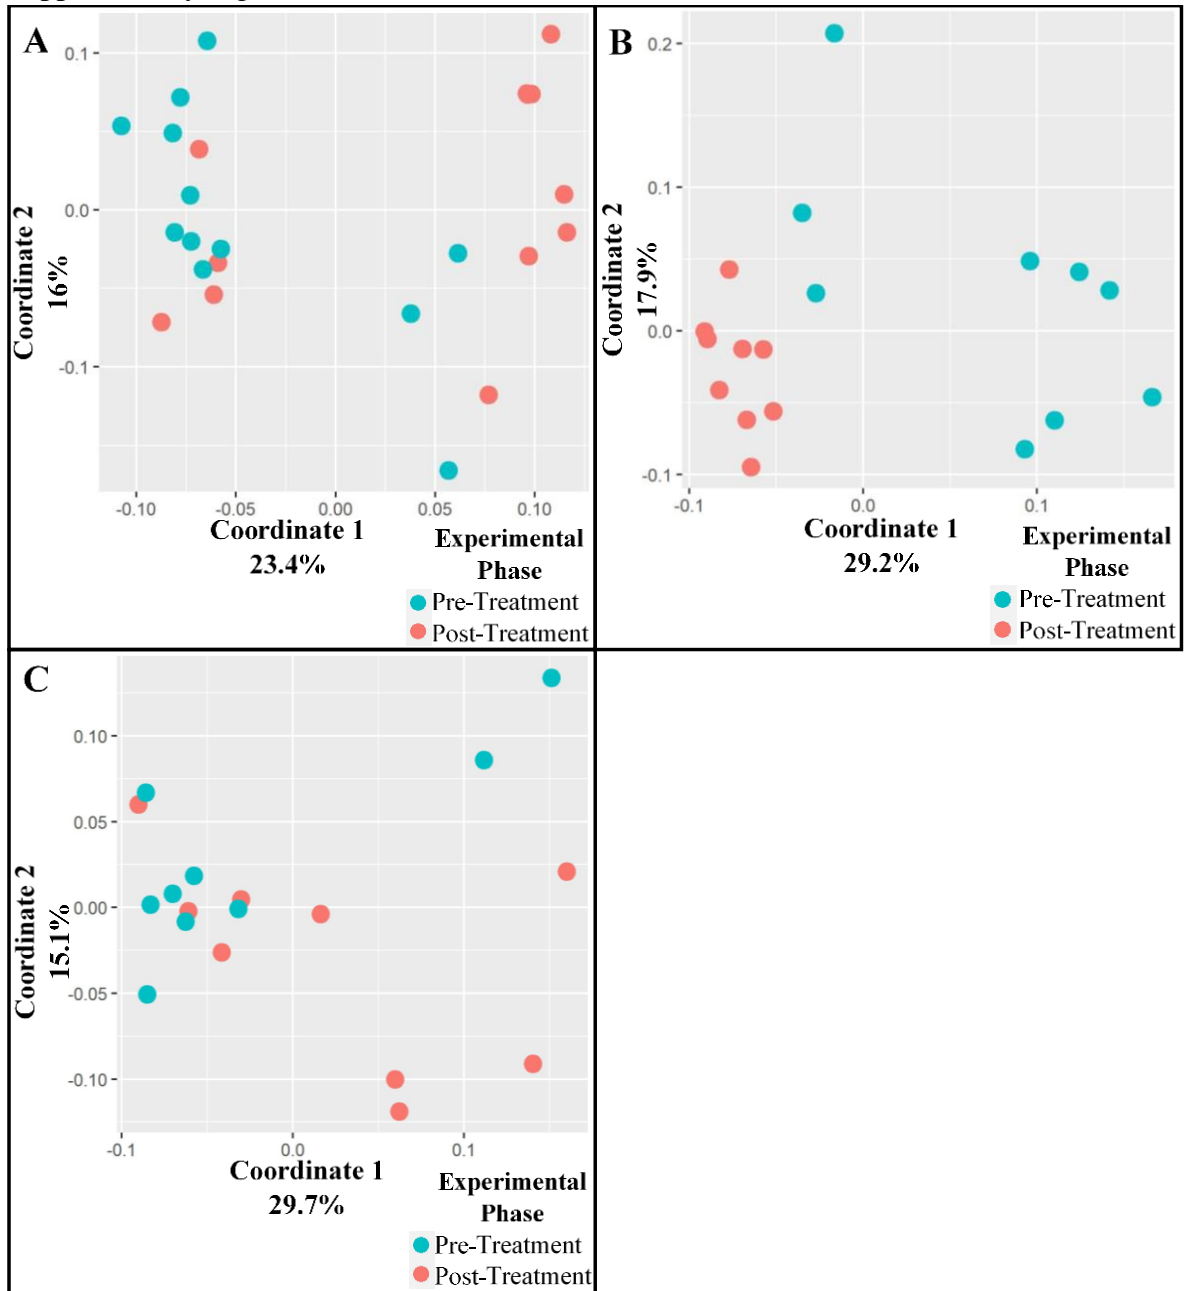

Supplementary Figure S1. **Pre and post treatment effect.** n; each point represents the microbiota composition of a single cage. **A:** Samples from the corticosterone treated-group only; pre-treatment (green) vs post-treatment (red) ANOSIM,  $P=0.003$ ,  $R=0.23$ . **B:** Samples from the oxytocin treated-group only; pre-treatment (green) vs post-treatment (red) ANOSIM,  $P=0.001$ ,  $R=0.54$ . **C:** Samples from the citalopram treated-group only; pre-treatment (green) vs post-treatment (red) ANOSIM,  $P=0.1$ ,  $R=0.07$ .
