# Supplementary material for: Specific Changes in the Mammalian Gut Microbiome as a Biomarker for Oxytocin-Induced Behavioral Changes
Source: Microorganisms. 2021 Sep 12;9(9):1938. doi: 10.3390/microorganisms9091938 (PMC8465812; doi:10.3390/microorganisms9091938)
Supplement: Supplementary file 1 [file microorganisms-09-01938-s001.zip]

Archive with 5 entries (5 files):
- Revised Supplementary Figure S1.pdf
- Revised Supplementary Figure S2.pdf
- Revised Supplementary Figure S3.pdf
- Revised Supplementary Figure S4.pdf
- Supplementary Figure caption.pdf
